# Supplementary material for: A phosphate starvation response regulator Ta-PHR1 is involved in phosphate signalling and increases grain yield in wheat
Source: PubMed Central journal article supplement — Ann Bot. 2013 Apr 14;111(6):1139–53. doi: 10.1093/aob/mct080 (PMC3662521; doi:10.1093/aob/mct080), 2013-04-14
Supplement: supp_mct080_mct080supp.pdf [file supp_mct080_mct080supp.pdf]

## SUPPLEMENTARY DATA

FIG. S1. Chromosome locations of *Ta-PHR1-A1*, *B1* and *D1*. *Ta-PHR-A1*, *Ta-PHR-B1* and *Ta-PHR-D1* were located between 7AS8-0.45 and 7AL1-0.39 on chromosome 7A, between 4BS4-0.37 and 4BL-0.71 on chromosome 4B and between 4DL9-0.31-0.56 on chromosome 4D, respectively.

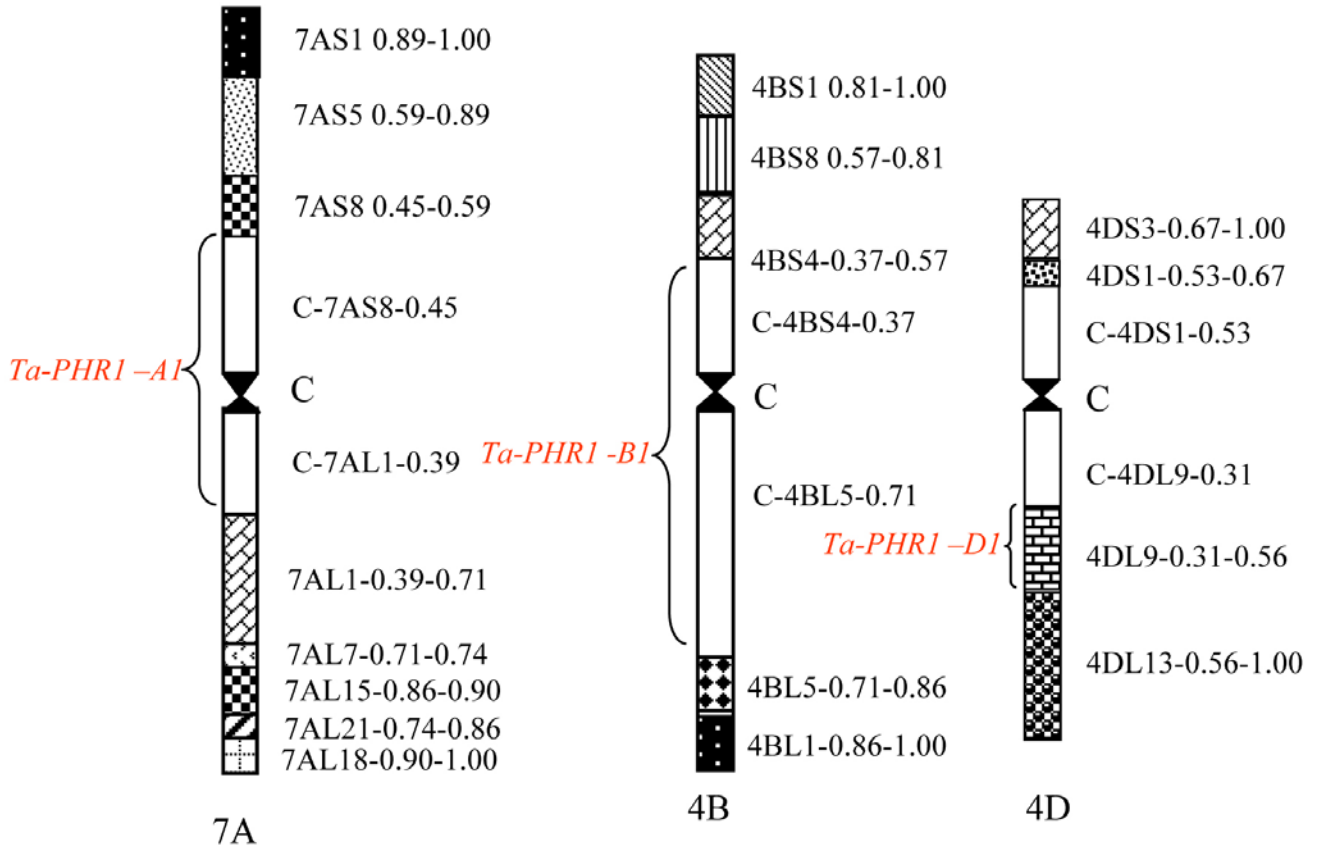

FIG. S2. Alignment of Ta-PHR1 protein sequences. MYB, MYB domain; C-C, CC domain. Multiple sequence alignment was carried out using the ClusTa-IX 1.81 program (Thompson *et al.*, 1997) with default multiple alignment parameters.

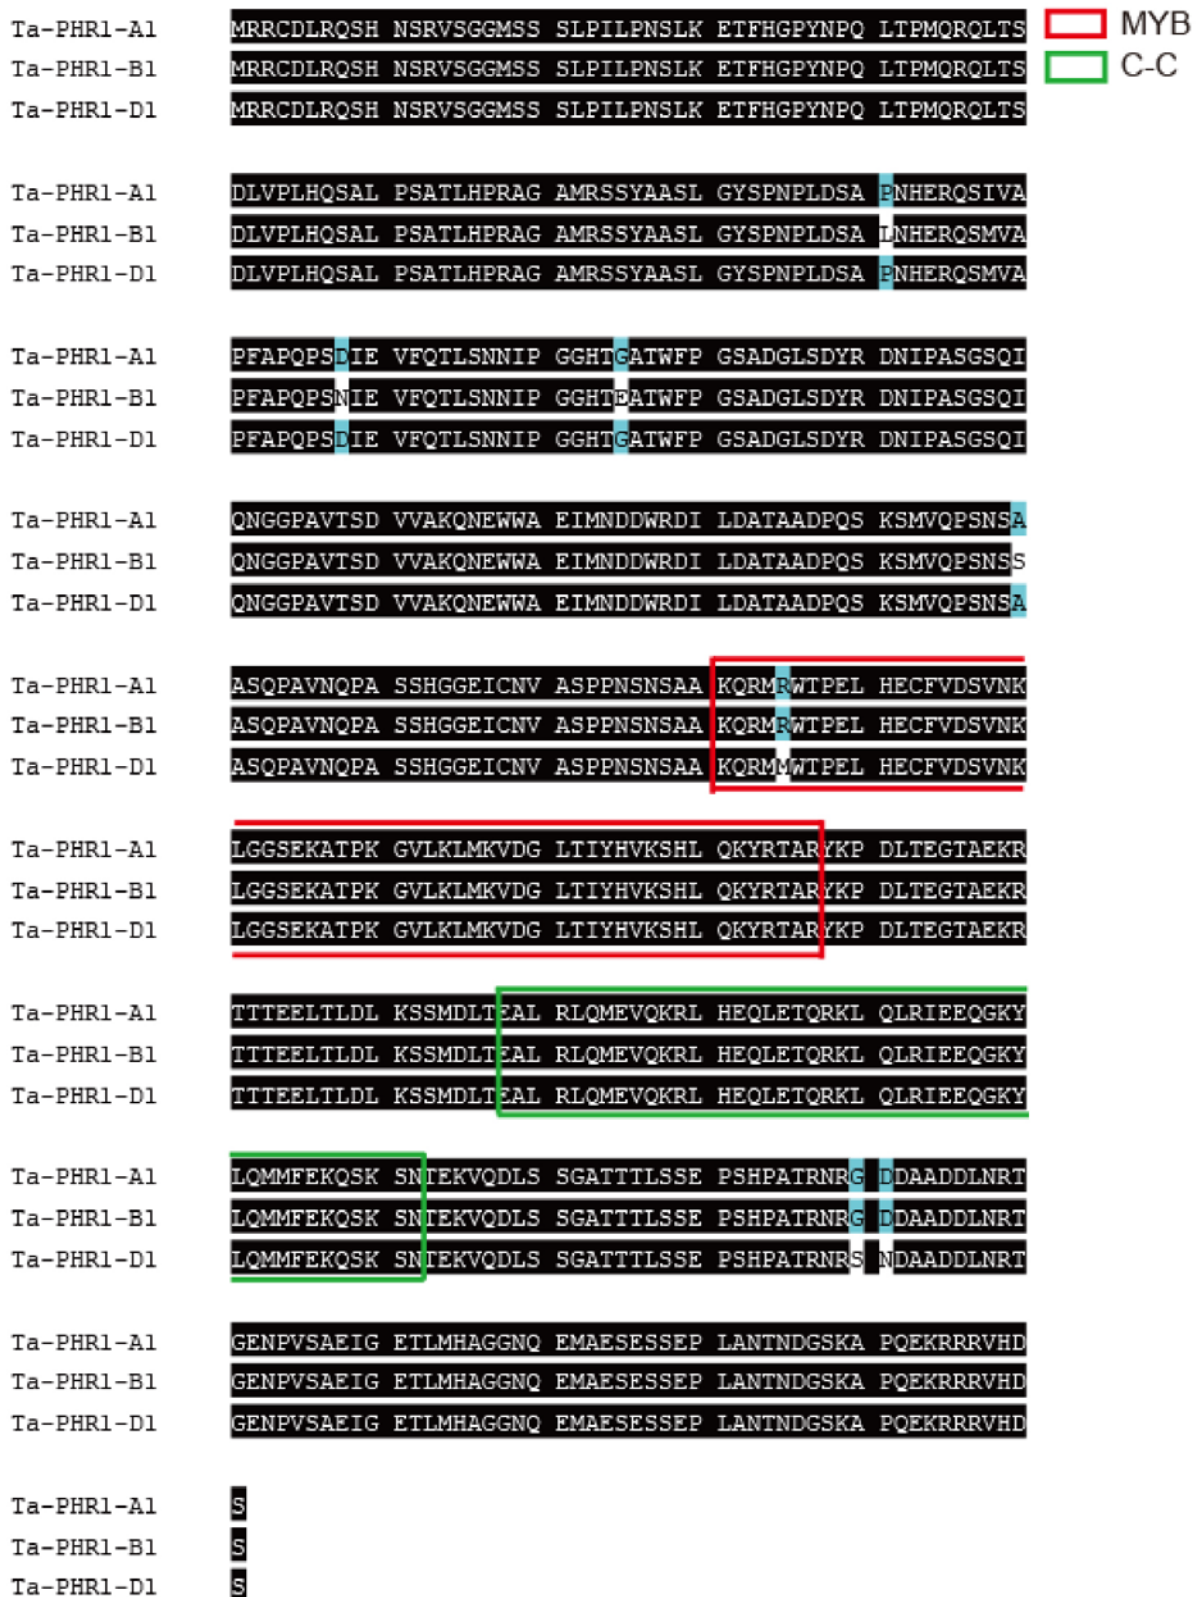

FIG. S3. Expression level of phosphate-starvation-inducible genes in wild-type (WT) and its *Ta-PHR1* transgenic lines under Pi-sufficient (200  $\mu$ M Pi) and Pi-deficient (10  $\mu$ M Pi) conditions. Seeds were germinated for 7 d, and then the germinated seeds with residual endosperm removed were transferred to nutrient solution containing 10  $\mu$ M Pi and 200  $\mu$ M Pi, respectively. After the plants were grown in the low and high P nutrient solutions for 7 d, the shoots and roots were collected separately for gene expression analysis. S, shoot; R, root; +P, 200  $\mu$ M Pi; -P, 10  $\mu$ M Pi. Values are mean  $\pm$  s.e. of three replications.

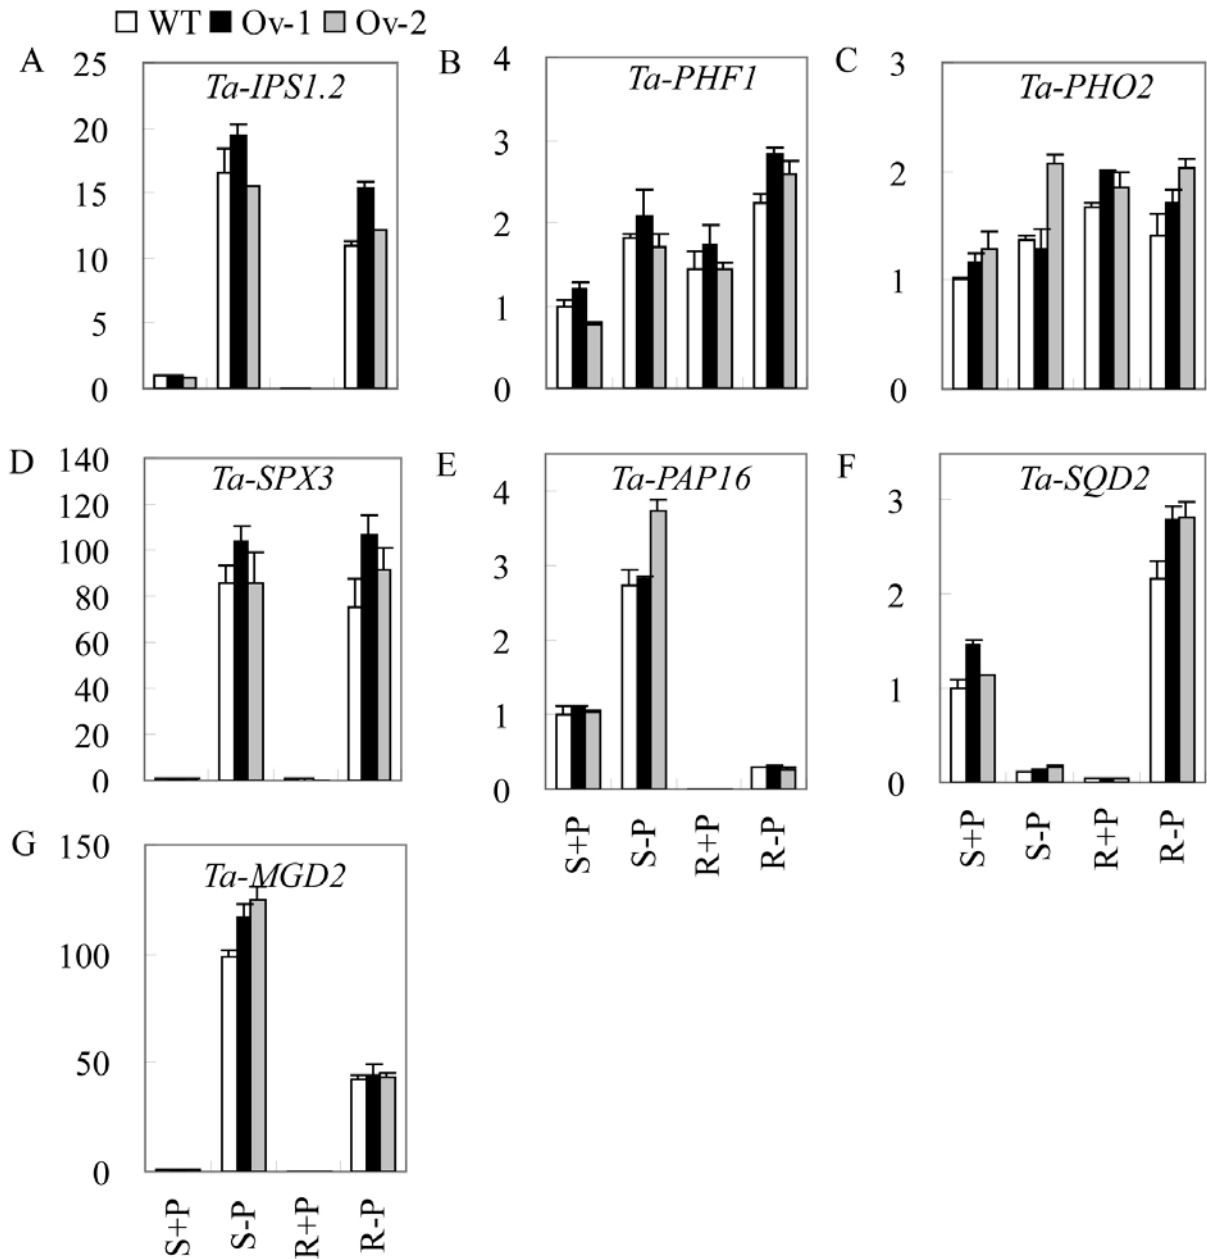

TABLE S1. Primers for RT-PCR or Real-time PCR analysis.

| Gene                      | Forward primer sequence(5'-3') | Reverse primer sequence(5'-3')                     | Description               |                                                   |                                                |
|---------------------------|--------------------------------|----------------------------------------------------|---------------------------|---------------------------------------------------|------------------------------------------------|
| <i>Ta-PHR1</i>            | <i>Ta-PHR1CF</i>               | GAATGGTGGGCAGAAATa-ATG                             | <i>Ta-PHR1CR</i>          | GGGGTTCTCTCCTGTTCa-TTT                            | Amplify a fragment from wheat cDNA template    |
|                           | <i>Ta-PHR1FE</i>               | GAATTCATGAGGAGGTGTGATCTGAG                         | <i>Ta-PHR1RS</i>          | GGTCGATTa-ACTa-TCATGCACCCTTCG                     | Amplify for coding sequences of Ta-PHR1-A1     |
|                           | <i>Ta-PHR1qF</i>               | TTCCCAGGTTCCGGCTGATG                               | <i>Ta-PHR1qR</i>          | CTGCCACCATTTCATTTTGT                              | Real time PCR primer of Ta-PHT1.2              |
|                           | <i>Ta-PHR1_BiFC_F</i>          | GGGACAAGTTTGTa-CAAAAAAGCAGGCTGCATGGAGTa-TCCATGGCTG | <i>Ta-PHR1_p101-CFP_R</i> | GGGGACCACTTTGTa-CAAGAAAGCTGGGTCTGATTGGCGTAATCCCAA | Amplify for coding sequences of Ta-PHR1-A1 for |
| <i>BiCF</i>               |                                |                                                    |                           |                                                   |                                                |
| <i>Ta-PHT1.2 promoter</i> | <i>proTa-PHT1.2FK</i>          | GGTa-CCAGTa-CGGCATA-CGGATTTCAATGC                  | <i>proTa-PHT1.2RS</i>     | GTCGACGGCCGCGGCGATCTCTC                           | Amplify for coding sequences of Ta-PHT1.2      |
| <i>Ta-Actin</i>           | <i>Ta-Actin qF</i>             | ACCTTCAGTTGCCAGCAAT                                | <i>Ta-Actin qR</i>        | CAGAGTCGAGCACAATa-CCAGTTG                         | Real time PCR primer of Ta-Actin               |
| <i>Ta-PHT1.2</i>          | <i>Ta-PHT1.2qF</i>             | GCATCTa-CTa-CACCGACCCT                             | <i>Ta-PHT1.2qR</i>        | ACGCGATGGAGCAGAGGAC                               | Real time PCR primer of Ta-PHT1.2              |
| <i>Ta-PHT1.6</i>          | <i>Ta-PHT1.6qF</i>             | CAGCTCTTCTTCGGCTGGCT                               | <i>Ta-PHT1.6qR</i>        | CCGAGCCAGAAGCGGAAGAA                              | Real time PCR primer of Ta-PHT1.6              |
| <i>Ta-PHF1</i>            | <i>Ta-PHF1qF</i>               | GAAAGAATGGCAAATCTGGCTC                             | <i>Ta-PHF1qR</i>          | TGCATGGCTTGGTa-GGTCG                              | Real time PCR primer of Ta-PHF1                |
| <i>Ta--IPS1.1</i>         | <i>Ta-IPS1.1qF</i>             | ATGGATCCGGCGTTGGCTa-G                              | <i>Ta-IPS1.1qR</i>        | AGTTGCCCTa-CCTTa-GTa-GAGGTGA                      | Real time PCR primer of Ta-IPS1.1              |
| <i>Ta-IPS1.2</i>          | <i>Ta-IPS1.2qF</i>             | ATGGATCCGGCGTTGGCTa-G                              | <i>Ta-IPS1.2qR</i>        | ATa-TTTa-TTGATGATTa-CACTa-GTCA                    | Real time PCR primer of Ta-IPS1.2              |
| <i>Ta-PHO2</i>            | <i>Ta-PHO2 qF</i>              | AGTTTa-TGAGGAAAGGATGGACCT                          | <i>Ta-PHO2 qR</i>         | ATa-GTGAACGGAAGGTGGTTCAT                          | Real time PCR primer of Ta-PHO2                |
| <i>Ta-SPX3</i>            | <i>Ta-SPX3 qF</i>              | GTGGAAGGACGAGTTCCTGAGC                             | <i>Ta-SPX3 qR</i>         | TCCCGGTGTGTGATGATGAAGAA                           | Real time PCR primer of Ta-SPX3                |
| <i>Ta-PAP16</i>           | <i>Ta-PAP16 qF</i>             | CGTa-CGAGAACTCTGGCTGTGT                            | <i>Ta-PAP16 qR</i>        | AGAGAACGGCTTCTCGGCTa-TCT                          | Real time PCR primer of Ta-PAP16               |
| <i>Ta-SQD2</i>            | <i>Ta-SQD2 qF</i>              | TGCCAGTGGAGATGTGTTTGTGAT                           | <i>Ta-SQD2 qR</i>         | AAGCTGGTCTTTCCTTCCTGAT                            | Real time PCR primer of Ta-SQD2                |
| <i>Ta-MGD2</i>            | <i>Ta-MGD2 qF</i>              | AGAGCTCCTa-CAAGTTCATGGTGAA                         | <i>Ta-MGD2 qR</i>         | AGTGTTGAGGTCGGTGATGACAG                           | Real time PCR primer of Ta-MGD2                |
| <i>Ta-ASA1</i>            | <i>Ta-ASA1 qF</i>              | ACGTTGAACGATa-TTCACATGTCA                          | <i>Ta-ASA1 qR</i>         | AACCCCTCAAAGCCACCACTGTa-                          | Real time PCR primer of Ta-ASA1                |
| <i>Ta-GH3.1</i>           | <i>Ta-GH3.1 qF</i>             | TGTCCTa-CACCATCATGCCGA                             | <i>Ta-GH3.1 qR</i>        | CTCGTCCGTCTTGTCCGACT                              | Real time PCR primer of Ta-GH3.1               |
| <i>Ta-CYCD2</i>           | <i>Ta-CYCD2 qF</i>             | GAGGGACGCCATa-GATTGGATT                            | <i>Ta-CYCD2 qR</i>        | TGAGCACCAAAGCTCCATCCT                             | Real time PCR primer of Ta-CYCD2               |
